# Supplementary material for: Electronic and structural properties of mixed-cation hybrid perovskites studied using an efficient spin–orbit included DFT-1/2 approach
Source: Royal Society of Chemistry journal article supplement (doi:10.1039/d3cp02472e), 2023-01-01
Supplement: d3cp02472e1.pdf [file d3cp02472e1.pdf]

Supplementary Information

# Electronic and Structural Properties of Mixed-Cation Hybrid Perovskites Studied by Efficient Spin-Orbit Included DFT-1/2 Approach

Mohammad Moaddeli

*Department of Materials Science and Engineering, School of Engineering, Shiraz University,  
Iran*

Mansour Kanani

*Department of Materials Science and Engineering, School of Engineering and Solar Energy  
Technology Development Center, Shiraz University, Iran*

Anna Grünebohm

*Interdisciplinary Centre for Advanced Materials Simulation (ICAMS) and Center for  
Interface-Dominated High Performance Materials (ZGH), Ruhr-University Bochum,  
Universitätsstr 150, 44801 Bochum, Germany*

## S1. DOS

The total densities of states (DOS) for single-cation perovskites calculated by PBE\_non-SOC (blue), PBE (red), and PBE-1/2 (black) are shown in [Figure S1](#).

## S2. Tetragonal Phase of **mapi**

In addition to the pseudo cubic phase of **mapi**, we also studied its tetragonal phase, which is stable at room temperature. [Figure S2](#) shows structure of the tetragonal phase of **mapi** as well as its band structure calculated using PBE-1/2. Each unit cell contains two

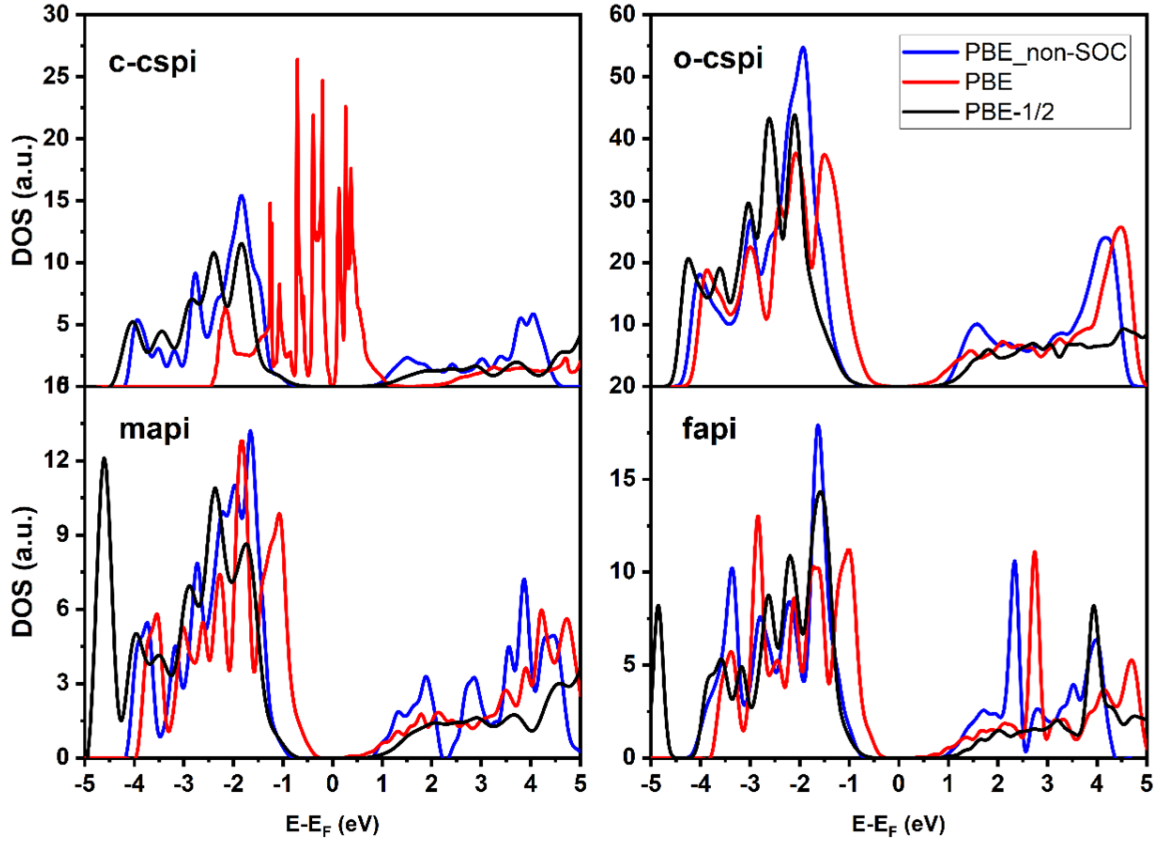

Figure S1: Total DOS for c-cspi, o-cspi, mapi, and fapi using PBE functional without SOC (PBE\_non-SOC, blue), with SOC (PBE, red) and PBE with SOC (PBE-1/2, black.)

MA cation which are oriented antiparallel to each other. Contrary to the cubic phase, there is a double degeneracy at the  $\Gamma$  point and no Rashba band splitting is present. The direct band gap at the  $\Gamma$  point is 1.7 eV.

### S3. Rashba Band Splitting

The Rashba interaction coefficient,  $\alpha$  is given as:

$$\alpha = \frac{2\epsilon^\#}{\Delta k}$$

where  $\epsilon^\#$  is the difference between the split curves at the extreme points (see [Figure S3](#)) and  $\Delta k$  is the respective position of the  $\epsilon^\#$  alongside the  $k$  axis in reciprocal space. Here,  $\epsilon^\#$  and thus  $\alpha$  differ for VB and CB and we define  $\alpha_+$ ( $\alpha_-$ ) for left (right) hand side of the point

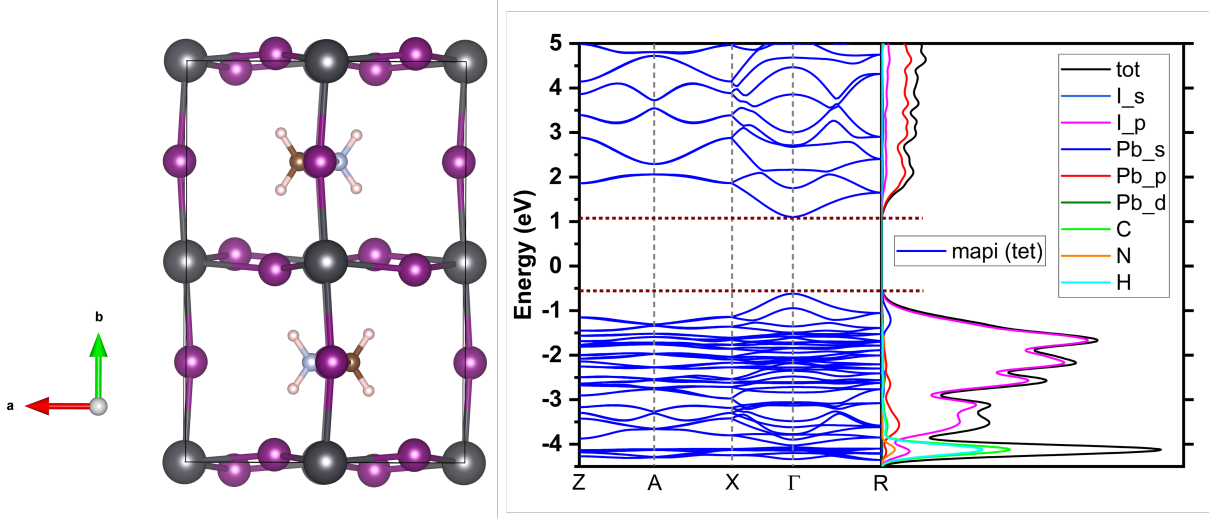

Figure S2: Left: Structure of the tetragonal phase of **mapi**. Each unit cell contains two MA cations which are aligned antiparallel to each other. Right: Band structure and PDOS for tetragonal **mapi**, using PBE-1/2. The Fermi energy is set to zero.

that band gap is appeared alongside. Therefore, a large (small) difference between  $\alpha_+$  and  $\alpha_-$  indicates a one-sided (two-sided) Rashba splitting.

Since the Rashba parameter ( $\alpha$ ) determines the derivation of the band curvature from a perfect parabola and the indirect nature of the band gap, we focus on the difference between the Rashba parameter in VBM and CBM ( $\Delta\alpha = \alpha_C - \alpha_V$ ). [Figure S4](#) shows  $\Delta\alpha_+$  ( $\alpha_{+C} - \alpha_{+V}$ ) and  $\Delta\alpha_-$  ( $\alpha_{-C} - \alpha_{-V}$ ), which are denoted by L and R, respectively. Both PBE and PBE-1/2 show the same trends for **mapi**. On the quantitative level, if PBE-1/2 corrections are included,  $\alpha$  is reduced from 3.2 to 2.4. An increase of about 1.4 is obtained for the right hand side of **fapi**. This large increase is related to the modification of CBM; as it is seen in [Figure 4](#) (single-cation band structures), the PBE-1/2 mostly modifies the CBM while VBM does not bear a sensible splitting. One might expect that the correction of the self-energy in PBE-1/2 also improves the quantitative description of  $\alpha$ .

Parameters of Rashba band splitting for the mixed systems are listed in [Table 3](#). The Rashba parameter decreases systematically from **fapi** to **fascpi** to **famascpi**. This is in full agreement with the discussed changes to the Pb-I bond distribution. The more uniform the bonds, the smaller the Rashba split. [Figure S5a](#) shows the left/right  $\alpha$  parameters for all systems under study. Disregarding the organic or inorganic nature of an additional cation,

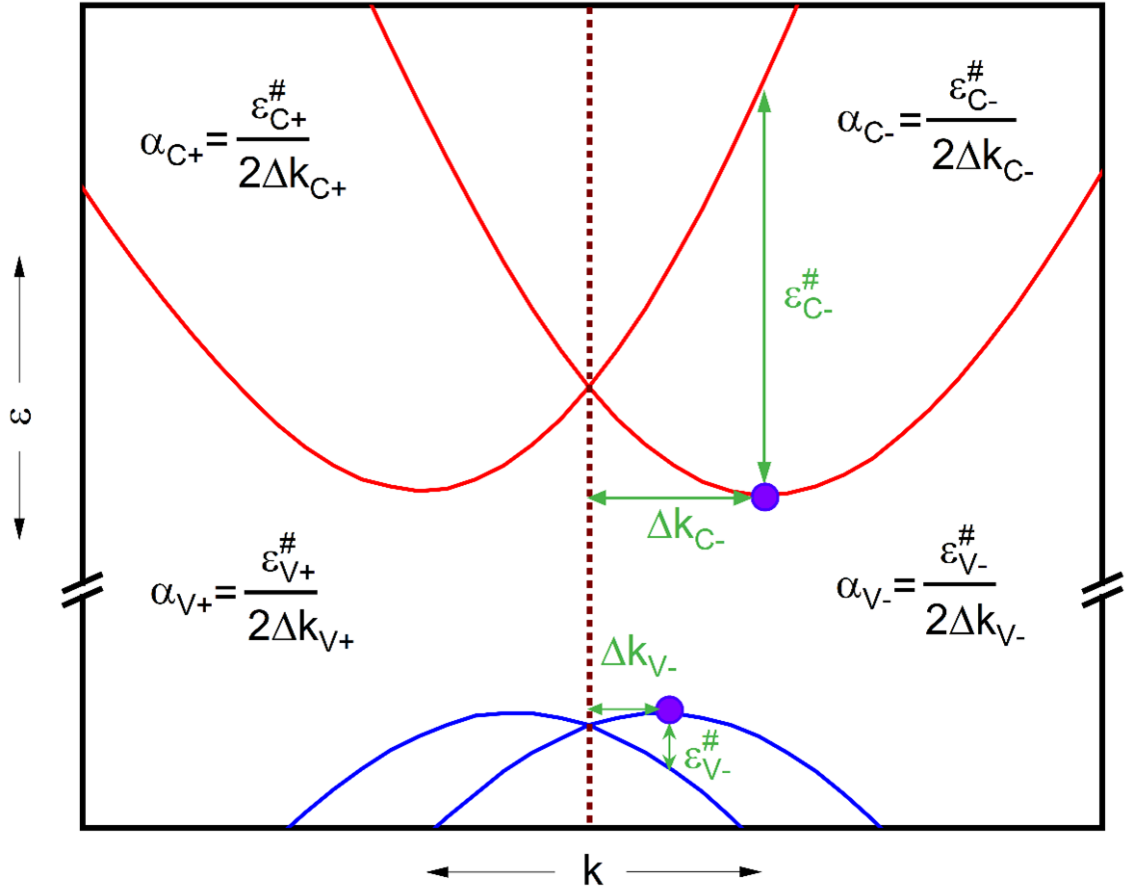

Figure S3: Rashba parameter,  $\alpha$ , in VB and CB according to derivation of energy bands with respect to an ideal parabolic band. V and C indices devote to valence and conduction band, respectively.

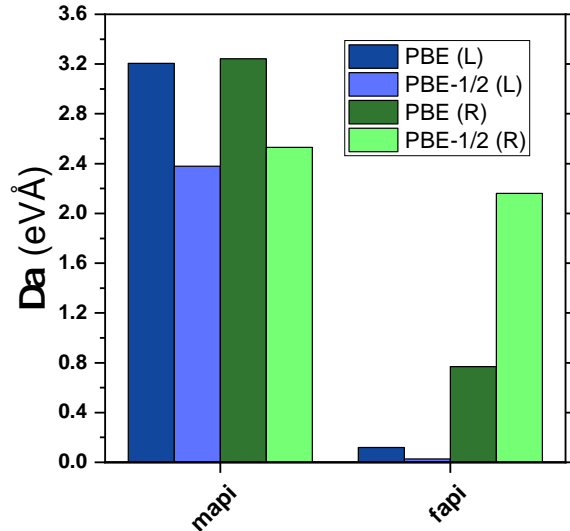

Figure S4: Difference between Rashba parameters in VB and CB ( $\Delta\alpha$ ) for **mapi** and **fapi** using PBE and PBE-1/2.

it reduces  $\alpha$  significantly. In the case of **facspi**, the nature of the one-sided splitting changes almost to a two-sided form. The reduction of Rashba band splitting intensity is shown in [Figure S5b](#). The triple **facspi** case has the lowest  $\Delta\alpha$  which means its band nature has the potential for a higher carrier recombination rate. This finding is in agreement with the experimental observations reported by Huang et. al. [1].

#### S4. Born effective charge

[Table S1](#) lists the Born effective charges for the studied single-cation systems. For the Born charges of iodine it is convenient to distinguish between the Born charge parallel to the Pb-I bond ( $Z_{||}$ ) and the two directions perpendicular to it ( $Z_{\perp}$ ). Compare solid and dashed arrows in [Figure S6](#). Note that [Table S1](#) lists the projections of  $Z$  on Cartesian directions (a,b,c). For **o-cspi**, the  $\text{PbI}_3$  scaffold is not aligned along these directions (see [Figure S6](#)) and thus the projection of  $Z$  is reduced compared to **c-cspi**.

#### S5. References

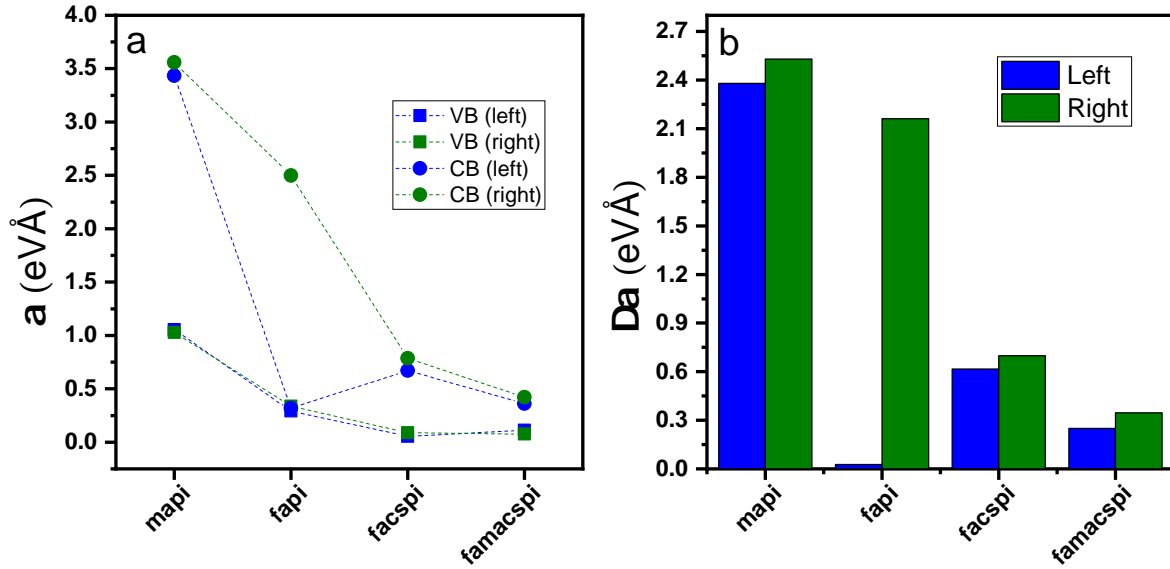

Figure S5: Rashba parameter for **mapi**, **fapi**, **facspi**, and **famacspi** using PBE-1/2. (a):  $\alpha$  in left and right hand side of VB and CB with respect to  $R$  and  $\Gamma$  points for single- and mixed-cation perovskites, respectively. (b):  $\Delta\alpha$  as the difference of VB and CB in left and right hand side.

## References

- [1] Huang, Z. *et al.* Band Engineering via Gradient Molecular Dopants for CsFA Perovskite Solar Cells. *Advanced Functional Materials* **31**, 2010572 (2021). URL <https://onlinelibrary.wiley.com/doi/10.1002/adfm.202010572>. 5

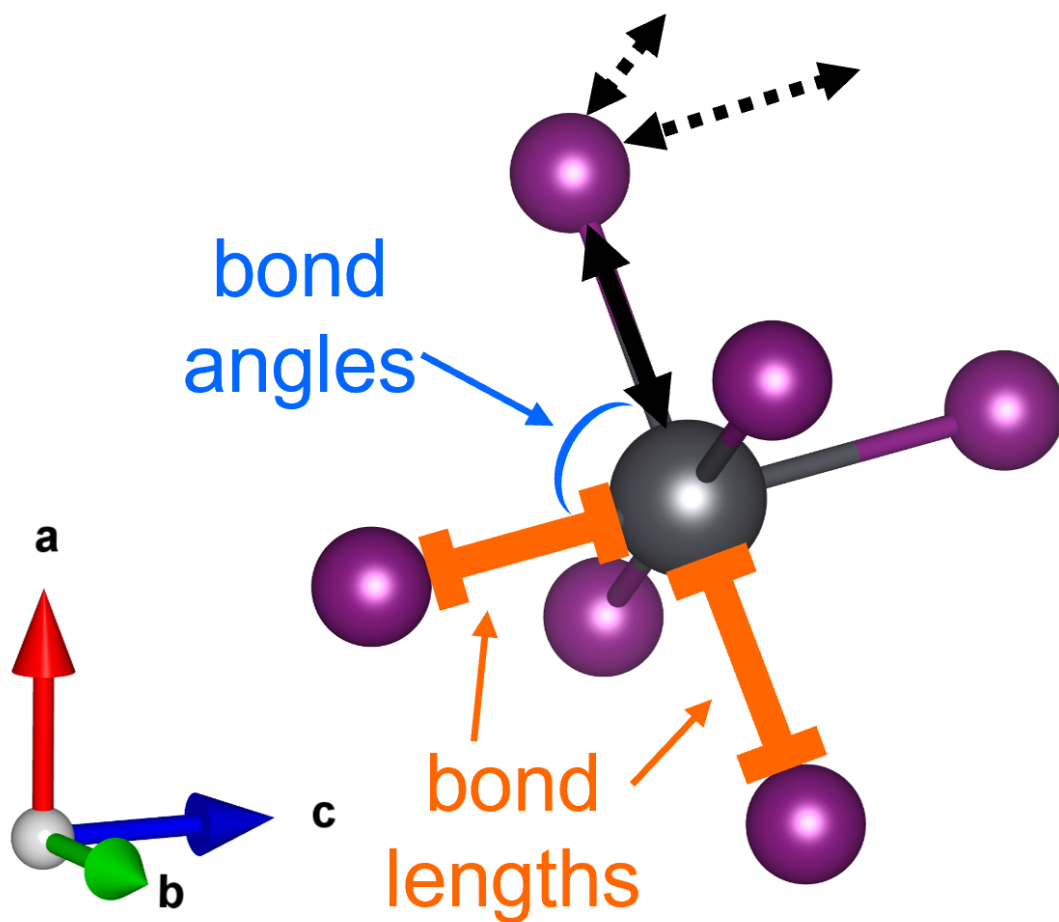

Figure S6: Illustration of one  $\text{Pb-I}_3$  scaffold in **o-cspi**. Orange lines mark the different Pb-I bond length in that scaffold and one I-Pb-I angle is exemplary marked. For each iodine, one can distinguish one direction parallel to the Pb-I bond ( $\parallel$ ) and two perpendicular directions ( $\perp$ ) as marked by solid and dashed arrows for the top I. While  $\parallel$  is approximately along the (pseudo)-cubic directions in **c-cspi** and **mapi**, the bonds deviate from (100), (010), and (001) for **o-cspi**.

Table S1: Impact of the chosen potential on the Born effective charges  $Z_{ii}^*$  for  $i : x, y, z$ . Note that  $Z_{xx}^* = Z_{yy}^* = Z_{zz}^*$  for cubic **cspi**, only. In case of pseudo-cubic **mapi**, the mean value of  $Z_{ii}^*$  is given. Upper part: Pb and I present in all systems. For I, it is convenient to define  $Z_{||}$ , the Born charge along the Cartesian direction with the smallest angle relative to the Pb-I bond and  $Z_{\perp}$ , the average of both other directions (refer to new figure with scaffold). Lower part: Total values for A-ions.

|               |          | PBE_non-SOC         | PBE         | PBE-1/2 | PBE_non-SOC                                      |                | PBE             |                | PBE-1/2         |                |
|---------------|----------|---------------------|-------------|---------|--------------------------------------------------|----------------|-----------------|----------------|-----------------|----------------|
|               |          | Pb                  |             |         | I <sub>  </sub>                                  | I <sub>⊥</sub> | I <sub>  </sub> | I <sub>⊥</sub> | I <sub>  </sub> | I <sub>⊥</sub> |
| <b>c-cspi</b> | $Z_{ii}$ | 4.83                | 5.49        | 4.19    | -4.68                                            | -0.76          | -6.27           | -0.29          | -3.94           | -0.78          |
|               | $Z_{xx}$ | 4.22                | 4.61        | 3.84    | -2.35                                            | -0.82          | -2.55           | -0.81          | -2.13           | -0.85          |
|               | $Z_{yy}$ | 4.35                | 4.75        | 3.92    | -2.44                                            | -0.75          | -2.64           | -0.75          | -2.20           | -0.78          |
| <b>o-cspi</b> | $Z_{zz}$ | 4.53                | 5.03        | 4.01    | -4.31                                            | -0.80          | -4.86           | -0.77          | -3.70           | -0.84          |
|               | $Z_{ii}$ | 4.40                | 4.78        | 3.93    | -4.25                                            | -0.72          | -4.64           | -0.71          | -3.64           | -0.78          |
|               | $Z_{xx}$ | 5.18                | 6.00        | 4.48    | -5.08                                            | -0.64          | -6.12           | -0.56          | -4.22           | -0.72          |
| <b>fapi</b>   | $Z_{yy}$ | 3.96                | 4.20        | 3.54    | -3.67                                            | -0.80          | -4.01           | -0.74          | -3.17           | -0.82          |
|               | $Z_{zz}$ | 4.77                | 5.25        | 4.22    | -4.67                                            | -0.79          | -5.28           | -0.74          | -3.93           | -0.86          |
|               |          |                     | PBE_non-SOC | PBE     | PBE-1/2                                          | PBE_non-SOC    |                 | PBE            |                 | PBE-1/2        |
|               |          | Cs in <b>c-cspi</b> |             |         | CH <sub>3</sub> NH <sub>3</sub> in <b>mapi</b>   |                |                 |                |                 |                |
| $Z_{ii}$      |          | 1.38                | 1.37        | 1.31    | 1.28                                             |                | 1.28            |                | 1.18            |                |
|               |          | Cs in <b>o-cspi</b> |             |         | CH(NH <sub>2</sub> ) <sub>2</sub> in <b>fapi</b> |                |                 |                |                 |                |
| $Z_{xx}$      |          | 1.30                | 1.30        | 1.28    | 1.18                                             |                | 1.22            |                | 1.17            |                |
| $Z_{yy}$      |          | 1.28                | 1.28        | 1.26    | 1.30                                             |                | 1.30            |                | 1.26            |                |
| $Z_{zz}$      |          | 1.38                | 1.38        | 1.35    | 1.48                                             |                | 1.51            |                | 1.42            |                |
